# Supplementary material for: Extension of an ICU-based noninvasive model to predict latent shock in the emergency department: an exploratory study
Source: PubMed Central journal article supplement (PMC11701063; doi:10.3389/fcvm.2024.1508766), 2024-12-23
Supplement: Datasheet1.pdf [file Datasheet1.pdf]

**TABLE S1.** Criteria to annotate hemodynamic instability between Mimic-IV-ICU Cohort and ICCA Cohort

| Mimic-IV-ICU Cohort*                       | ICCA Cohort**                              |
|--------------------------------------------|--------------------------------------------|
| <b>Inotropic and vasoactive drugs</b>      | <b>Inotropic and vasoactive drugs</b>      |
| 1.Dobutamine                               | 1. Dopamine                                |
| 2.Dopamine                                 | 2. Epinephrine                             |
| 3.Epinephrine                              | 3. Levophed                                |
| 4.Levophed                                 | 4. Isoproterenol                           |
| 5.Neosynephrine                            | 5. Norepinephrine                          |
| 6.Norepinephrine                           | 6. Vasopressin                             |
| 8.Phenylephrine                            |                                            |
| 9.Vasopressin                              |                                            |
| <b>Mean arterial pressure (MBP)</b>        | <b>Mean arterial pressure (MBP)</b>        |
| Two consecutive recordings of MBP < 65mmHg | Two consecutive recordings of MBP < 65mmHg |

\*Mimic-IV-ICU Cohort which was used to developed the model of adult hemodynamic instability (AHI)

\*\*ICCA Cohort in ED for this AHI external validation study

**TABLE S2.** Clinical features

| Feature name                                | Unit         | Plausibility low | Plausibility high | Feature type |
|---------------------------------------------|--------------|------------------|-------------------|--------------|
| Age                                         | years        | 18               | 140               | noninvasive  |
| Gender                                      |              |                  |                   | noninvasive  |
| non-invasive diastolic blood pressure(nDBP) | mmHg         | 0                | 250               | noninvasive  |
| non-invasive systolic blood pressure(nSBP)  | mmHg         | 0                | 270               | noninvasive  |
| non-invasive mean blood pressure(nMBP)      | mmHg         | 0                | 250               | noninvasive  |
| Heart rate(HR)                              | bpm          | 0                | 600               | noninvasive  |
| Respiration rate(RR)                        | times/min    | 0                | 50                | noninvasive  |
| Temperature                                 | degrees (°C) | 34               | 42                | noninvasive  |
| oxygen saturation(SpO2)                     | %            | 0                | 100               | noninvasive  |

**Table S3** Multivariate regression analysis of potential shock.

| Characteristics                                         | MIMIC-IV-ICU <sup>a</sup> |                 | MIMIC-IV-ED <sup>b</sup> |                 |
|---------------------------------------------------------|---------------------------|-----------------|--------------------------|-----------------|
|                                                         | HR (95% CI)               | <i>P</i> -value | HR (95% CI)              | <i>P</i> -value |
| Age (per year)                                          | 1.0 (1.0, 1.0)            | < 0.001         | 1.0 (1.0, 1.0)           | 0.005           |
| Gender (Male vs Female)                                 | 1.0 (0.9, 1.0)            | 0.316           | 1.0 (0.8, 1.2)           | 0.986           |
| non-invasive diastolic blood pressure (nDBP, per mmHg)  | 1.0 (1.0, 1.0)            | < 0.001         | 0.7 (0.6, 0.9)           | 0.004           |
| non-invasive systolic blood pressure (nSBP, per mmHg)   | 1.0 (1.0, 1.0)            | < 0.001         | 0.8 (0.7, 0.9)           | <0.001          |
| non-invasive mean blood pressure (nMBP, per mmHg)       | 0.9 (0.9, 0.9)            | < 0.001         | 1.2 (0.9, 1.6)           | 0.241           |
| heart rate (HR, beats per minute)                       | 1.0 (1.0, 1.0)            | < 0.001         | 1.1 (1.0, 1.1)           | < 0.001         |
| respiration rate (RR, beats per minute)                 | 1.0 (1.0, 1.0)            | < 0.001         | 1.1 (1.0, 1.1)           | < 0.001         |
| transcutaneous Oxygen Saturation (SpO <sub>2</sub> , %) | 1.0 (1.0, 1.0)            | < 0.001         | 1.1 (1.0, 1.1)           | 0.006           |
| non-invasive shock index (nSI)                          | 6.7 (3.3, 13.5)           | < 0.001         | 0.0 (0.0, 0.0)           | < 0.001         |

*CI*: confidence interval; *HR*: hazard ratio. The *P*-value was used to assess whether the strength of the association between risk factors and latent shock was statistically significant. Multivariate regression analysis are based on the complete cases without missing value. All factors were simultaneously put into the Multivariate regression model.

<sup>a</sup>Multivariate regression analyses are based on Medical Information Mart for Intensive Care (MIMIC) IV-ICU v3.0 dataset.

<sup>b</sup>Multivariate regression analyses are based on MIMIC-IV-ED dataset.

**TABLE S4.** Patient information and characteristics of externally validated data on 0 minute, Median (Q1, Q3)

|                                         | Latent Shock      | Non-latent Shock | <i>P</i> -values |
|-----------------------------------------|-------------------|------------------|------------------|
| Patients, N                             | 56                | 1956             |                  |
| Age, year Median (Q1, Q3)               | 72.0 (62.5-83.0)  | 67.0 (56.0-76.0) | 0.011            |
| Gender (Male), N (%)                    | 44 (78.6%)        | 1247 (63.8%)     | 0.023            |
| heart rate (HR, beats per minute)       | 98.0 (83.0-117.5) | 84.5 (72.0-97.8) | <0.001           |
| respiration rate (RR, beats per minute) | 23.0 (18.0-29.0)  | 19.0 (16.0-23.0) | <0.001           |

|                                                         |                  |                     |        |
|---------------------------------------------------------|------------------|---------------------|--------|
| transcutaneous Oxygen Saturation (SpO <sub>2</sub> , %) | 96.0 (91.0-99.0) | 98.0 (96.0-100.0)   | 0.001  |
| non-invasive systolic blood pressure (nSBP, mmHg)       | 87.0 (77.0-96.2) | 130.0 (115.0-149.0) | <0.001 |
| non-invasive diastolic blood pressure (nDBP, mmHg)      | 50.5 (43.0-54.0) | 78.0 (68.0-89.0)    | <0.001 |
| non-invasive mean blood pressure (nMBP, mmHg)           | 62.0 (57.0-64.0) | 94.0 (83.0-106.0)   | <0.001 |

---

Patient information and features from the Philips IntelliSpace Critical Care and Anesthesia (ICCA) systems in ED of Zhongnan Hospital of Wuhan University from December 2022 to July 2023; Q1: the first quartile; Q3: the third quartile; P-values was calculated using non-parametric tests or Chi-square tests based on variable type.
